# Supplementary material
Source: publisher figshare collection journal article supplement (https://sage.figshare.com/ndownloader/files/16832366)
Supplement: Supplementary file 1 [file 16832366]

**Supplemental Table 1. Objectives for the Resident Research Certificate Program**

|                                                                                                                                                                                                                                                                                                                                                                                                                                                                                                                                                                                                        |
|--------------------------------------------------------------------------------------------------------------------------------------------------------------------------------------------------------------------------------------------------------------------------------------------------------------------------------------------------------------------------------------------------------------------------------------------------------------------------------------------------------------------------------------------------------------------------------------------------------|
| <p>Identify strategies for creating an effective database</p> <p>Given a research question and data, identify the correct statistical test</p> <p>Calculate and interpret number needed to treat, relative risk and odds ratio</p> <p>Obtain information needed for a baseline characteristics table from a database</p> <p>List the typical steps in the journal submission process</p> <p>Describe the advantages and disadvantages of various study designs</p> <p>List assumptions of linear, logistic and cox regression</p> <p>Differentiate between a meta-analysis and a systematic review</p> |
|--------------------------------------------------------------------------------------------------------------------------------------------------------------------------------------------------------------------------------------------------------------------------------------------------------------------------------------------------------------------------------------------------------------------------------------------------------------------------------------------------------------------------------------------------------------------------------------------------------|

**Supplemental Table 2. Selected Sample Questions from Worksheets Utilized in the Certificate Program**

1. Categorize each variable is nominal, ordinal or continuous:  
Blood glucose:  
Race:  
HASBLED score:  
Mortality status:  
LDL:  
Uncontrolled blood pressure:
2. Use the following data to calculate a 95% confidence interval.  
Sample size= 158  
Mean= 92  
Standard deviation= 33
3. Determine which characteristics are consistent with a normal distribution:  
Symmetrical or Skewed?  
\_\_\_\_\_ % of the data are encompassed in  $\pm 2$  standard deviations from the mean
4. Which of these results represent a statistically significant difference?
  - a. 13% vs 15%,  $p = 0.07$
  - b. Mean difference = 4 mmHg (95%CI = -5 to 15)
  - c. Relative risk = 1.7 (95%CI = 1.5 to 1.9)
  - d. Odds ratio = 1.3 (95%CI = 0.8 to 1.9)
5. A Pearson's correlation coefficient (r) of 0.25 represents:
  - a. A moderate positive linear relationship
  - b. A moderate negative linear relationship
  - c. No linear relationship
  - d. A weak positive linear relationship
  - e. A weak negative linear relationship

**Supplemental Table 3. Responses to Items Assessing Attitude, Confidence and Knowledge Stratified by Postgraduate Year <sup>a,b</sup>**

|                                                               | <b>Baseline</b>  |                  | <b>Follow-up</b> |                  |
|---------------------------------------------------------------|------------------|------------------|------------------|------------------|
|                                                               | <b>PGY1</b>      | <b>PGY2</b>      | <b>PGY1</b>      | <b>PGY2</b>      |
|                                                               | <b>n (%)</b>     | <b>n (%)</b>     | <b>n (%)</b>     | <b>n (%)</b>     |
|                                                               | <b>n=9</b>       | <b>n=12</b>      | <b>n=9</b>       | <b>n=12</b>      |
| <b>Attitude</b>                                               |                  |                  |                  |                  |
| Understand majority of statistical terms                      | 1 (11.1)         | 4 (33.3)         | 5 (55.6)         | 10 (83.3)        |
| Statistical information assists in decisions for patient care | 6 (66.7)         | 11 (91.7)        | 9 (100)          | 12 (100)         |
| <b>Confidence</b>                                             |                  |                  |                  |                  |
| Critique statistical methods                                  | 2 (22.2)         | 4 (33.3)         | 5 (56.6)         | 10 (83.3)        |
| Discuss statistical methods with colleagues                   | 0 (0)            | 2 (16.7)         | 4 (44.4)         | 10 (83.3)        |
| Forming my own opinion even if it differs from author(s)      | 4 (44.4)         | 9 (75.0)         | 7 (77.8)         | 11 (91.7)        |
| Interpret <i>p</i> value                                      | 8 (88.9)         | 11 (91.7)        | 9 (100)          | 12 (100)         |
| Identify what influences study power                          | 4 (44.4)         | 8 (66.7)         | 7 (77.8)         | 12 (100)         |
| Calculate number needed to treat                              | 8 (88.9)         | 8 (66.7)         | 7 (77.8)         | 11 (91.7)        |
| <b>Knowledge</b>                                              |                  |                  |                  |                  |
| Mean (SD) score, %                                            | 57.8 (24.4)      | 62.5 (21.4)      | 53.3 (21.1)      | 71.7 (15.3)      |
| Median (IQR) score, %                                         | 70.0 (30.0-80.0) | 65.0 (42.5-77.5) | 60.0 (35.0-65.0) | 70.0 (62.5-80.0) |

<sup>a</sup>Data represent number of residents who agreed or strongly agreed unless otherwise indicated

<sup>b</sup>IQR=interquartile range; SD=standard deviation
